# Supplementary material
Source: publisher site journal article supplement (https://www.spandidos-publications.com/7900/downloadSupplementary)
Supplement: Supplementary file 1 [file downloadSupplementary]

**Table SI.** siRNAs of genes.

| <b>siRNA</b> | <b>Sense (5'-3')</b>  | <b>Antisense (5'-3')</b> |
|--------------|-----------------------|--------------------------|
| XPO1-siRNA1  | GCAGAUGCUUCCUUUAAAUTT | AUUUAAAGGAAGCAUCUGCTT    |
| XPO1-siRNA2  | CAGCUGAAAUACCUCAAAUTT | AUUUGAGGUAUUUCAGCUGTT    |
| p53-siRNA    | CCACCAUCCACUACAACUATT | UAGUUGUAGUGGAUGGUGGTT    |
| NC-siRNA     | UUCUCCGAACGUGUCACGUTT | ACGUGACACGUUCGGAGAATT    |

NC, negative control; siRNA, small interfering RNA; XPO1, exportin 1.
